# Supplementary material for: Adherence to the Mediterranean Diet and Its Association with the Level of Physical Activity in Fitness Center Users: Croatian-Based Study
Source: MDPI journal article supplement (doi:10.3390/nu13114038), 2021-11-12
Supplement: s1 [file s1]

## Supplementary Material

**Table S1.** Adherence to the MDSS components and differences regarding gender.

| <b>Parameter</b>  | <b>Study Sample<br/>N = 1220</b> | <b>Males<br/>N = 690</b> | <b>Females<br/>N = 530</b> | <b><i>p</i> *</b> |
|-------------------|----------------------------------|--------------------------|----------------------------|-------------------|
| Cereals (N, %)    | 336 (27.6)                       | 186 (27.0)               | 150 (28.3)                 | 0.659             |
| Potatoes (N, %)   | 1028 (84.3)                      | 579 (83.9)               | 449 (84.9)                 | 0.704             |
| Olive oil (N, %)  | 263 (21.6)                       | 146 (21.2)               | 117 (22.2)                 | 0.726             |
| Nuts (N, %)       | 469 (38.5)                       | 275 (39.9)               | 194 (36.7)                 | 0.283             |
| Fruits (N, %)     | 326 (26.7)                       | 165 (23.9)               | 161 (30.4)                 | 0.013             |
| Vegetables (N, %) | 380 (31.1)                       | 203 (29.4)               | 177 (33.4)                 | 0.154             |
| Dairy (N, %)      | 336 (27.6)                       | 185 (26.8)               | 151 (28.5)                 | 0.544             |
| Legumes (N, %)    | 831 (68.2)                       | 462 (67.0)               | 369 (69.8)                 | 0.328             |
| Eggs (N, %)       | 605 (49.7)                       | 339 (49.2)               | 266 (50.3)                 | 0.751             |
| Fish (N, %)       | 725 (59.5)                       | 405 (58.8)               | 320 (60.5)                 | 0.586             |
| White meat (N, %) | 1005 (82.4)                      | 561 (81.3)               | 444 (83.8)                 | 0.295             |
| Red meat (N, %)   | 405 (33.2)                       | 225 (32.7)               | 180 (34.0)                 | 0.675             |
| Sweets (N, %)     | 662 (54.3)                       | 357 (51.7)               | 305 (57.5)                 | 0.049             |
| Wine (N, %)       | 98 (8.0)                         | 58 (8.4)                 | 40 (7.6)                   | 0.666             |

All data are presented as whole numbers (percentage). \* Chi-square test.
